# Supplementary material for: Reconstructing atmospheric H 2 over the past century from bi-polar firn air records
Source: Copernicus journal article supplement (doi:10.5194/cp-2023-27), 2023-05-05
Supplement: Supplementary file 1 [file cp-2023-27-supplement.pdf]

1 **Supplement for Reconstructing atmospheric H<sub>2</sub> over the past century from bi-polar firn air records**

2 John D. Patterson<sup>1</sup>, Murat Aydin<sup>1</sup>, Andrew M. Crotwell<sup>2,3</sup>, Gabrielle Pétron<sup>2,3</sup>, Jeffery P. Severinghaus<sup>4</sup>, Paul B.  
3 Krummel<sup>5</sup>, Ray L. Langenfelds<sup>5</sup>, Vasilii V. Petrenko<sup>6</sup>, and Eric S. Saltzman<sup>1</sup>

4  
5 <sup>1</sup>Department of Earth System Science, University of California, Irvine, Irvine, CA 92697, USA

6 <sup>2</sup>Cooperative Institute for Research in Environmental Sciences, University of Colorado, Boulder, Boulder, CO 80309,  
7 USA

8 <sup>3</sup>Global Monitoring Laboratory, National Oceanic and Atmospheric Administration, Boulder, CO 80305, USA

9 <sup>4</sup>Scripps Institution of Oceanography, University of California, San Diego, La Jolla, CA 92093, USA

10 <sup>5</sup>Climate Science Centre, Commonwealth Scientific and Industrial Research Organisation, Environment, Aspendale,  
11 Victoria 3195, Australia

12 <sup>6</sup>Department of Earth and Environmental Sciences, University of Rochester, Rochester, NY 14627, USA

13

14 **Text S1: Calibration of NEEM reconstructions from Petrenko et al., (2013)**

15 The reconstructions published by Petrenko et al. (2013) were based on measurements made at NOAA/GML  
16 on the NOAA96 calibration scale. The NOAA96 calibration scale is known to have drifted over time due to  
17 increasing H<sub>2</sub> in most GML H<sub>2</sub> calibration standards stored in high pressure aluminum cylinders. As a part of the  
18 NEEM firn air sampling campaign (July 2008), matched flask pairs were filled at 12 unique depths. One flask of  
19 each pair was analyzed at NOAA/GML and the other was analyzed at CSIRO. On average, the CSIRO  
20 measurements were 23.8 ppb higher than the NOAA measurements made on the same samples. At that time, CSIRO  
21 was using the CSIRO94 calibration scale. Since then, CSIRO has formally revised their measurements to the MPI09  
22 scale (Jordan & Steinberg, 2011, Section 2.2). On average, the revised measurements are 16.5 ppb higher than the  
23 original measurements. On the basis of these two empirical comparisons, we have added 40.3 ppb (i.e. 23.8 + 16.5  
24 ppb) to the reconstructions published by Petrenko et al. (2013) to correct them to the modern MPI09 calibration. The  
25 corrected reconstructions are plotted in Figure 4a.

26

27

28

29

30

31

32

33

34

35

36

37

38

39

40

41

42 **Figure S1: Modelled H<sub>2</sub> age distributions (“Green’s functions”) for several depths at NEEM (a) and Summit**  
43 (b)

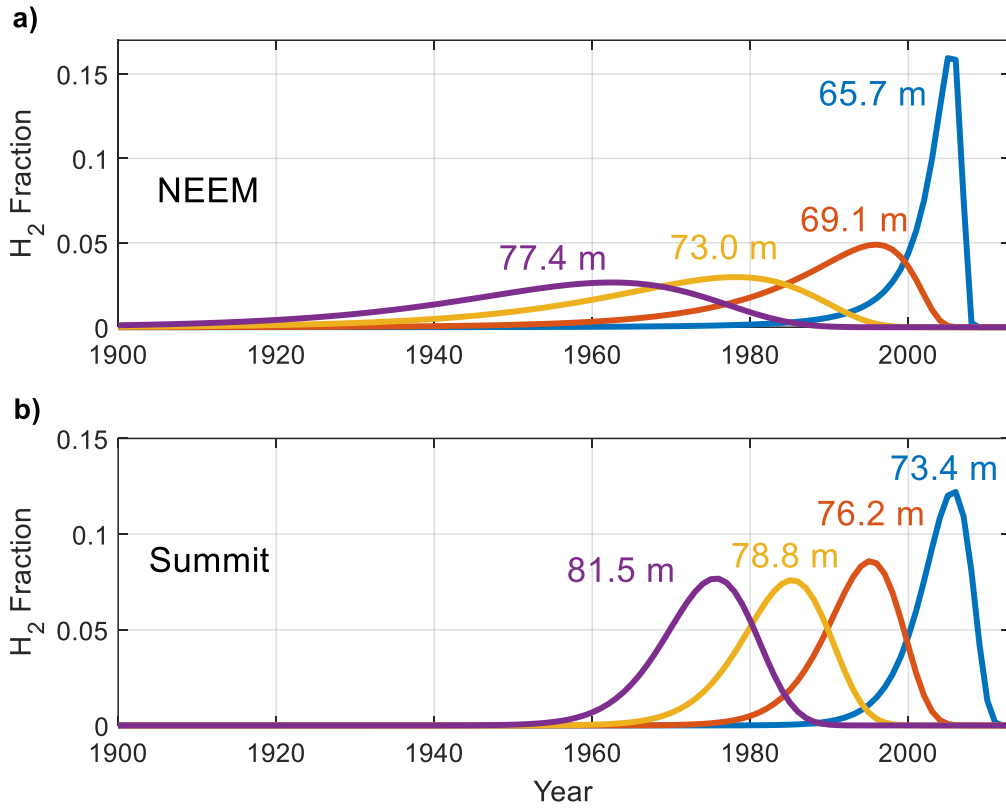

44

45

46

47

48

49

50

51

52

53

54

55

56

57

58

59 **Figure S2: Atmospheric H<sub>2</sub> reconstructed from Summit firn air measurements; the reconstruction shows a**  
60 **more pronounced increase and maximum when the uncertainty on the firn air measurements is reduced.**  
61 **Orange line and shading- result from Summit and associated  $\pm 1\sigma$  uncertainty as in Figure 1; teal line and**  
62 **shading- result from Summit and associated  $\pm 1\sigma$  uncertainty with the uncertainty on the Summit firn air**  
63 **measurements arbitrarily reduced by 25%; black x's-annual mean synthetic Summit H<sub>2</sub> history (Section 5;**  
64 **Pétron et al., 2023, Langenfelds et al., 2002)**

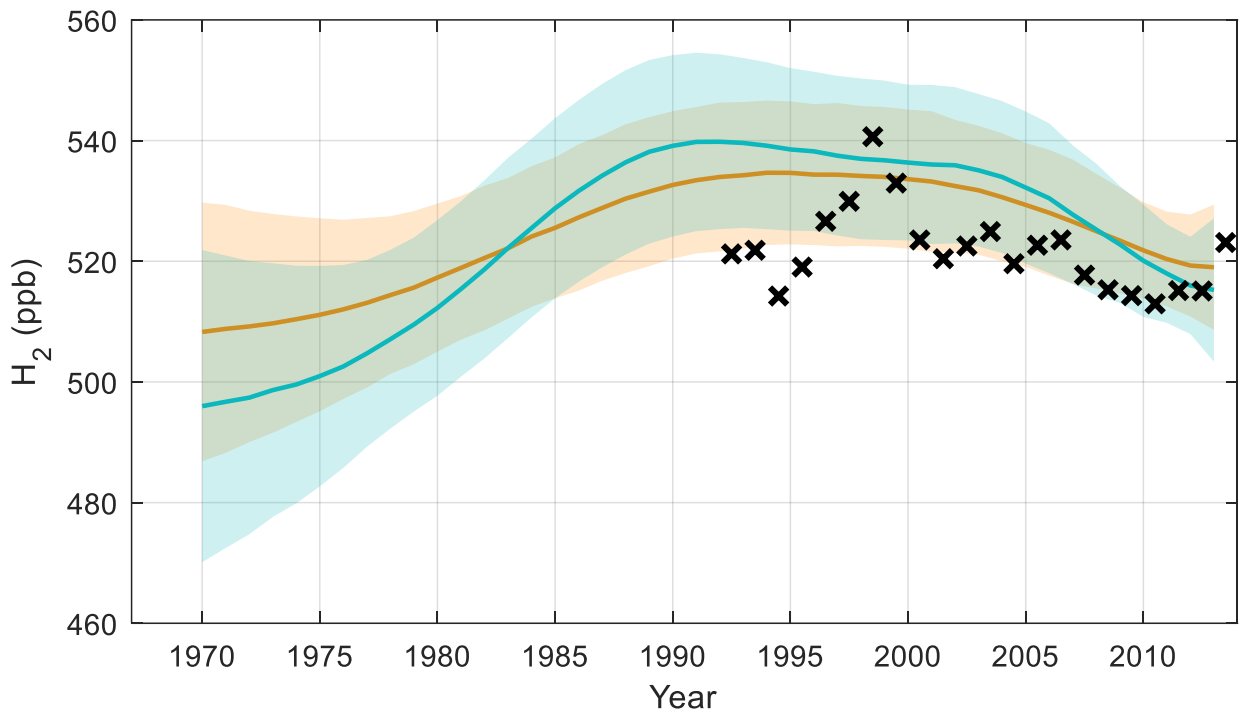

65

66

67

68

69

70

71

72

73

74

75

76

77

78

79

80 **Figure S3: Atmospheric histories reconstructed independently from firn air profiles at three Greenland sites**  
81 **as in Figure 1. The larger non-linearity correction form Jordan & Steinberg (2011) has been applied to the**  
82 **firn air measurements from Tunu. For comparison, the original Tunu atmospheric history from Figure 1a is**  
83 **plotted as the dark red dashed line in a) and the measurements from Figure 1d have been plotted as green**  
84 **triangles in d). The same trends are observed in both Tunu histories, but the history resulting from the**  
85 **Jordan & Steinberg (2011) non-linearity correction is ~15 ppb higher than the history resulting from the**  
86 **NOAA/GML non-linearity correction. There is still an apparent calibration offset between the Tunu history**  
87 **and the histories reconstructed from the other two sites.**

88

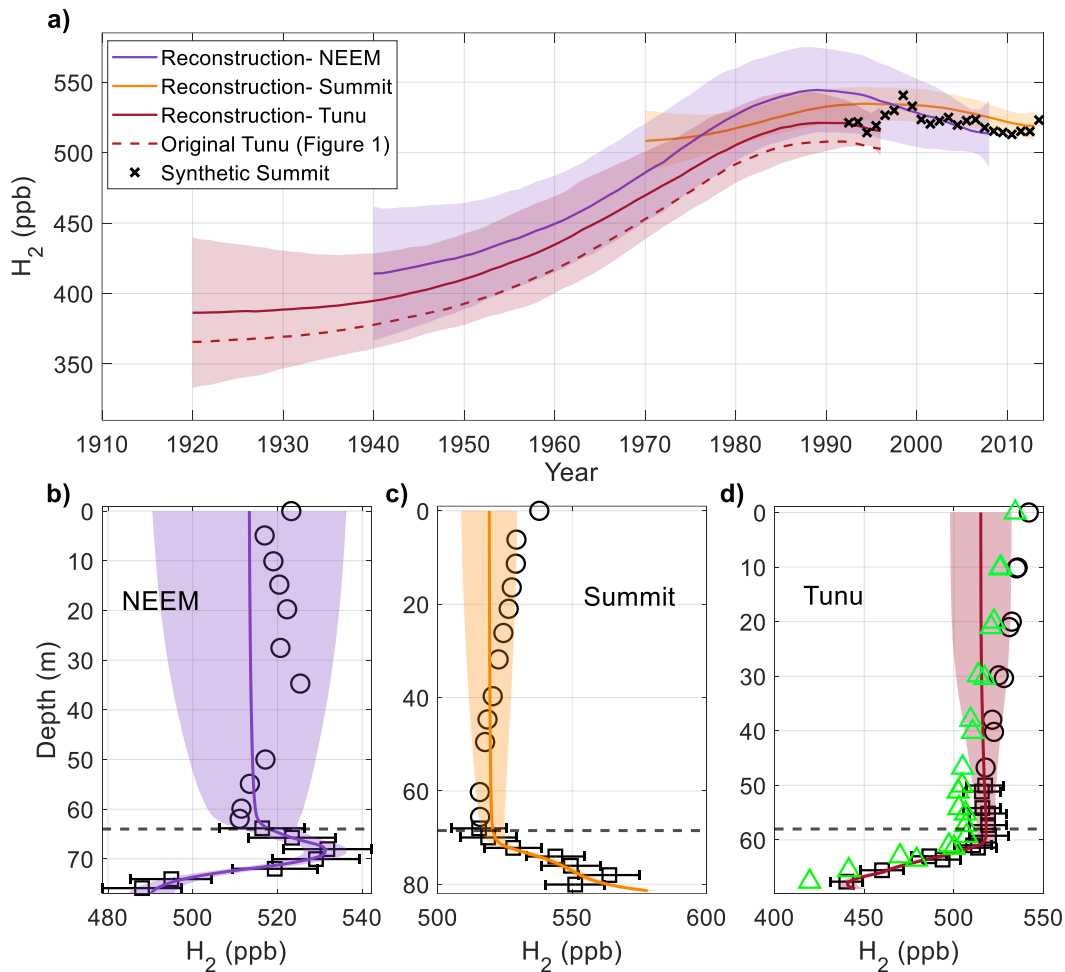

89

90

91

92

93

94

95

96

97 **Figure S4: Joint atmospheric H<sub>2</sub> reconstruction using firn air from three Greenland sites (NEEM, Summit,**  
98 **and Tunu) as in Figure 2. The larger non-linearity correction form Jordan & Steinberg (2011) has been**  
99 **applied to the firn air measurements from Tunu. For comparison, the original joint atmospheric history from**  
100 **Figure 2 is plotted as the dashed magenta in a) and the measurements from Figure 2d have been plotted as**  
101 **green triangles in d). The differences between original joint reconstruction and the Jordan & Steinberg**  
102 **(2011) corrected reconstruction are minimal because of the inclusion of the calibration offset parameter in the**  
103 **inversion ( $\gamma$ ). Optimized  $\gamma$  is 1.071 in the original reconstruction and 1.038 in the Jordan & Steinberg (2011)**  
104 **corrected reconstruction. The different  $\gamma$ 's compensate for the different corrections.**

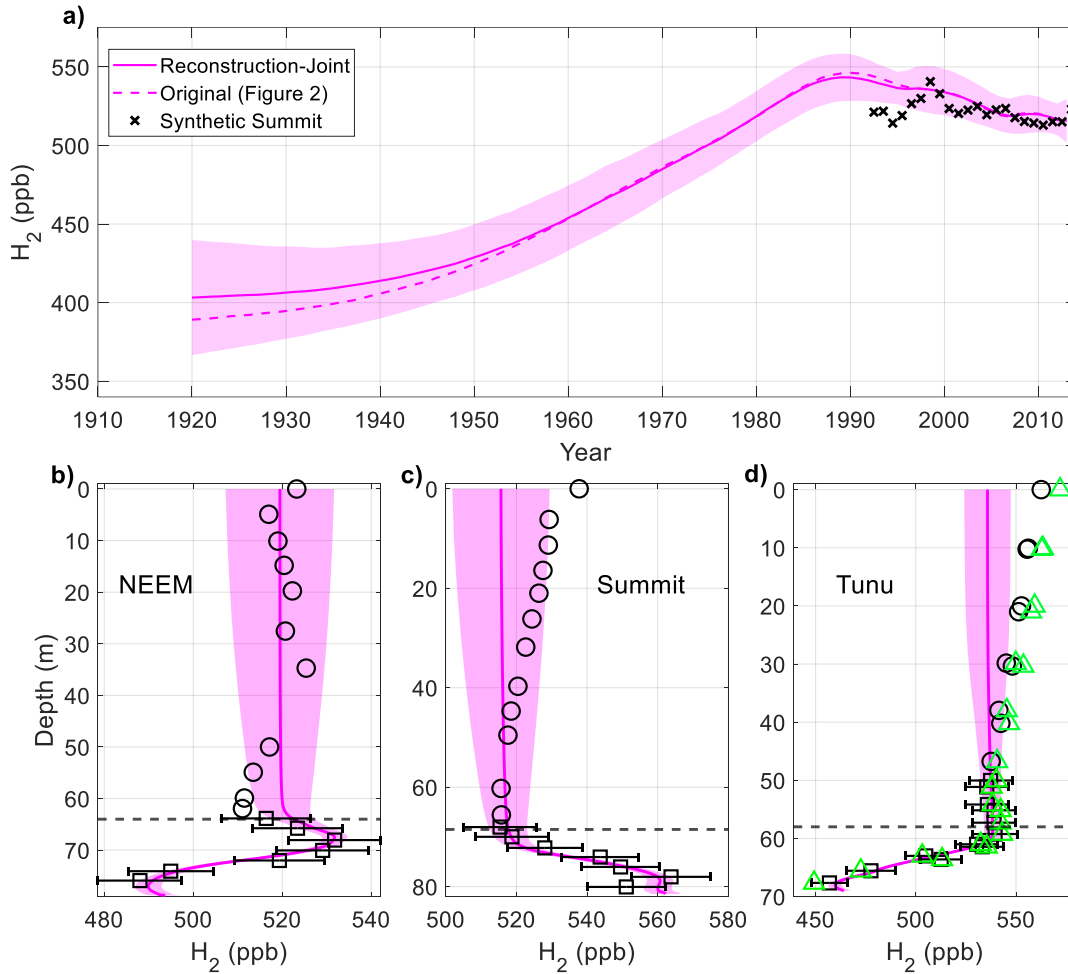

105

106

107

108

109

110

111

112

113 **Figure S5: The synthetic history used to force the firn air model (blue line and shading in a) and depth**  
114 **profiles generated by the model (blue line and shading in b-d) as described in Section 5. Firn air**  
115 **measurements are plotted in b-d as in Figure 2. For comparison, the joint reconstruction and corresponding**  
116 **modeled depth profiles are plotted as dashed pink lines. The depth profiles modeled from the synthetic**  
117 **history show substantially poorer agreement with the measurements, particularly from 65-70 m at NEEM**  
118 **and 50-60 m at Tunu.**

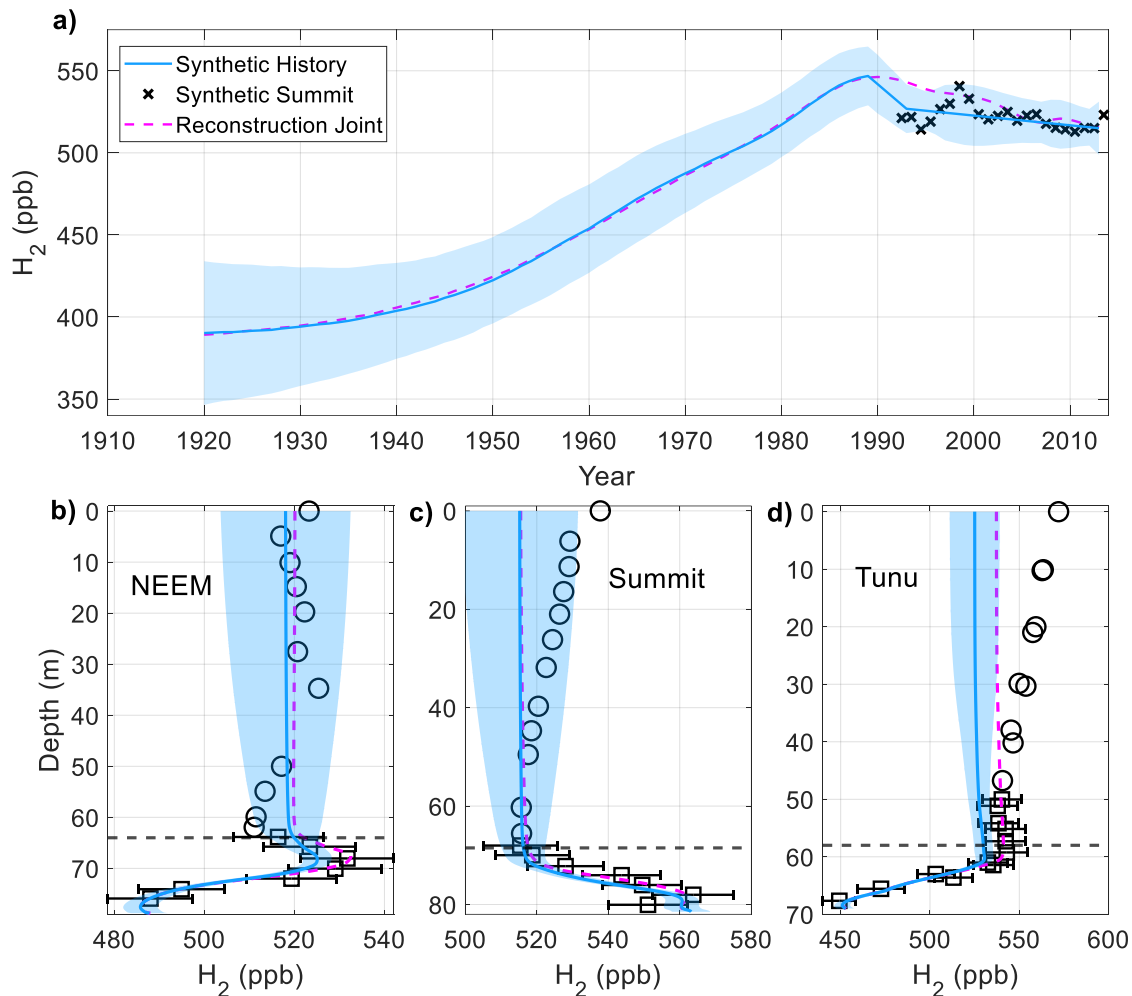

119

120

121

122

123

124

125

126

127

128 **Figure S6: Density profiles used to model firn air at NEEM (a) and Summit (b). Annual mean density (black**  
129 **lines are based on measurements (Buizert et al., 2012; Adolph & Albert, 2014); Winter layer density (blue**  
130 **lines) and summer layer density (red lines) are estimated based on Fujita et al., 2014.**

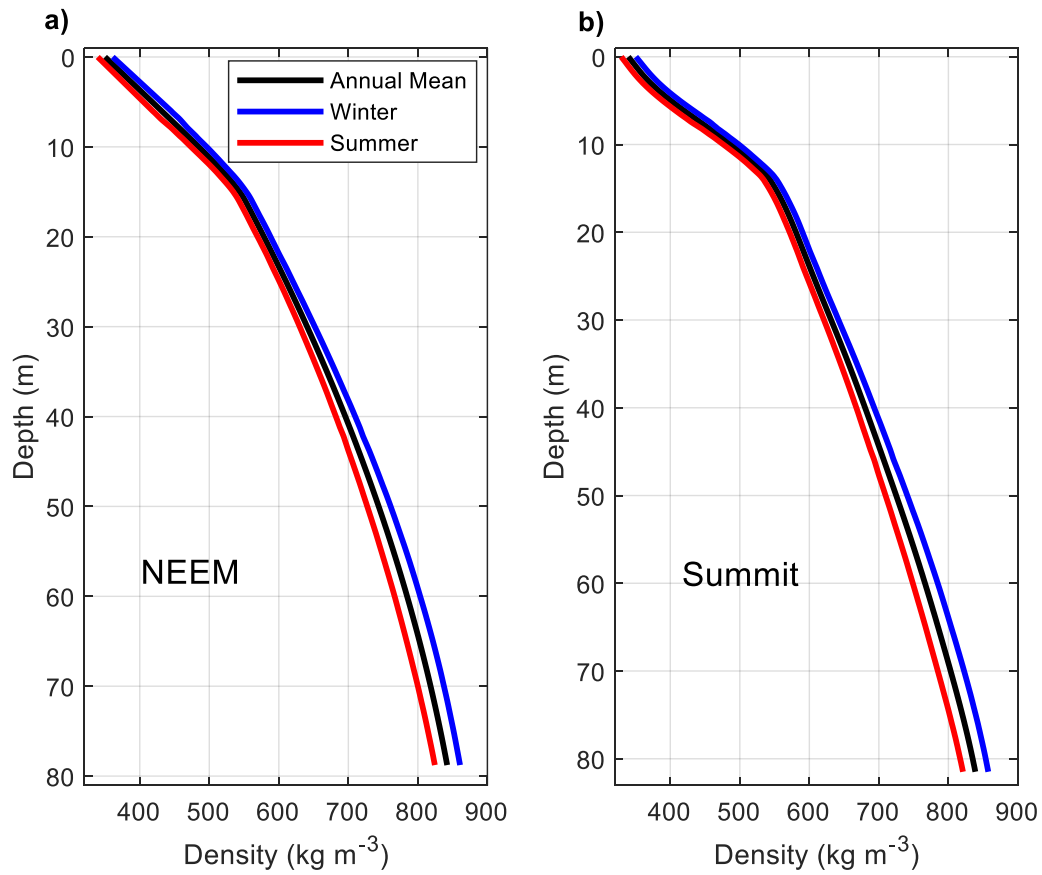

131

132

133

134

135

136

137

138

139

140

141

142

143

144 **Figure S7: Measured and modelled CO<sub>2</sub> and CH<sub>4</sub> in the firn air at NEEM and Summit. Magenta lines- CO<sub>2</sub>**  
145 **and CH<sub>4</sub> levels generated by the original UCI\_2 model; dashed lavender lines- CO<sub>2</sub> and CH<sub>4</sub> levels generated**  
146 **by the model with seasonal layering implemented (Section 7.1); maroon lines- CO<sub>2</sub> and CH<sub>4</sub> levels generated**  
147 **by the model with reduced bubble compression (Section 7.2); dotted cyan lines- CO<sub>2</sub> and CH<sub>4</sub> levels generated**  
148 **by the model with both seasonal layering and reduced bubble compression (Section 7.3); black squares- CO<sub>2</sub>**  
149 **and CH<sub>4</sub> measurements corrected for gravitational fractionation and depth-averaged. Modelled CO<sub>2</sub> and CH<sub>4</sub>**  
150 **are insensitive to the revisions described in Section 7 because they are not affected by pore close-off**  
151 **fractionation.**

152

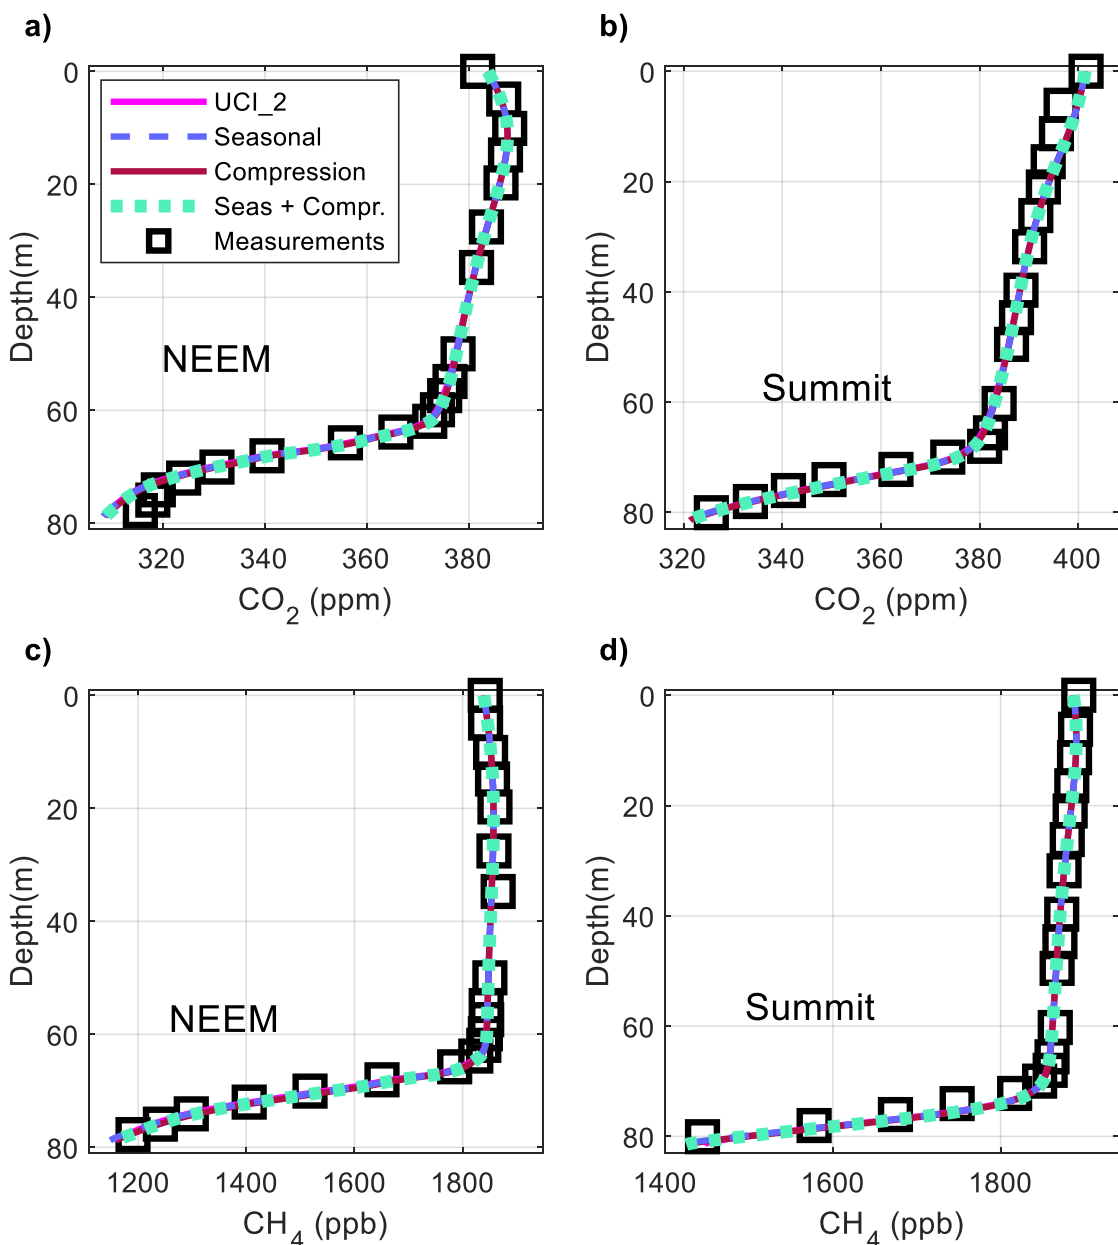

153

154



155

156 **References**

157 Jordan, A., & Steinberg, B. (2011). Calibration of atmospheric hydrogen measurements. *Atmospheric Measurement*  
158 *Techniques*, 4(3), 509–521. <https://doi.org/10.5194/amt-4-509-2011>

159 Langenfels, R. L., Francey, R. J., Pak, B. C., Steele, L. P., Lloyd, J., Trudinger, C. M., & Allison, C. E. (2002).  
160 Interannual growth rate variations of atmospheric CO<sub>2</sub> and its  $\delta^{13}\text{C}$ , H<sub>2</sub>, CH<sub>4</sub>, and CO between 1992 and  
161 1999 linked to biomass burning. *Global Biogeochemical Cycles*, 16(3).  
162 <https://doi.org/10.1029/2001gb001466>

163 Petrenko, V. v., Martinerie, P., Novelli, P., Etheridge, D. M., Levin, I., Wang, Z., Blunier, T., Chappellaz, J., Kaiser,  
164 J., Lang, P., Steele, L. P., Hammer, S., Mak, J., Langenfels, R. L., Schwander, J., Severinghaus, J. P.,  
165 Witrant, E., Petron, G., Battle, M. O., ... White, J. W. C. (2013). A 60 yr record of atmospheric carbon  
166 monoxide reconstructed from Greenland firn air. *Atmospheric Chemistry and Physics*, 13(15), 7567–7585.  
167 <https://doi.org/10.5194/acp-13-7567-2013>

168 Pétron, G., Crotwell, A., Kitzis, M., Madronich, D., Mefford, T., Moglia, E., Mund, J., Neff, D., Thoning, K., &  
169 Wolter, S. (2023). *Atmospheric Hydrogen Dry Air Mole Fractions from the NOAA GML Carbon Cycle*  
170 *Cooperative Global Air Sampling Network, 2009-Present [Data set]*. <https://doi.org/10.15138/WP0W-EZ08>

171

172
